# Supplementary material for: Endoplasmic Reticulum Stress Impaired Uncoupling Protein 1 Expression via the Suppression of Peroxisome Proliferator-Activated Receptor γ Binding Activity in Mice Beige Adipocytes
Source: Int J Mol Sci. 2019 Jan 11;20(2):274. doi: 10.3390/ijms20020274 (PMC6359291; doi:10.3390/ijms20020274)
Supplement: Supplementary file 1 [file ijms-20-00274-s001.pdf]

## Supplementary Material

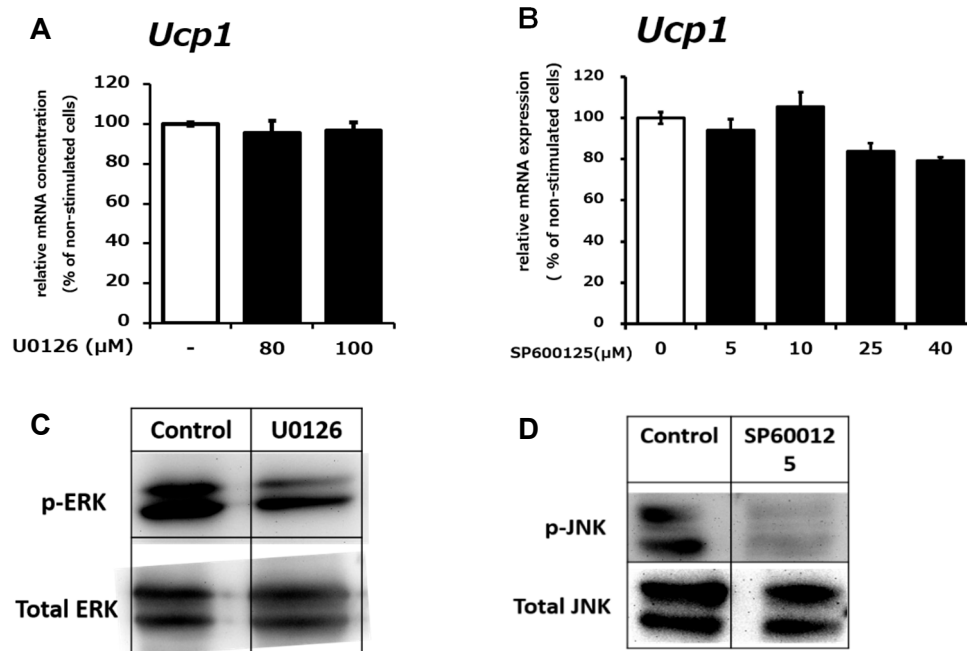

**Figure S1.** The effect of extracellular signal-regulated kinase (ERK) and c-Jun N-terminal kinase (JNK) inhibitor in beige adipocytes. Uncoupling protein 1 (*Ucp1*) mRNA expression in immortalized inguinal white adipose tissue cells (IWAT cells) after treated at different concentration of (A) ERK inhibitor (U0126) or (B) JNK inhibitor (SP600125) for 14 h or 13 h, respectively. The phosphorylation of (C) ERK or (D) JNK in IWAT cells after treated with 100  $\mu$ M U0126 for 14 h or 25  $\mu$ M SP600125 for 13 h, respectively. Data are presented as mean  $\pm$  S.E.M. (error bars).  $n = 4$  in each group.

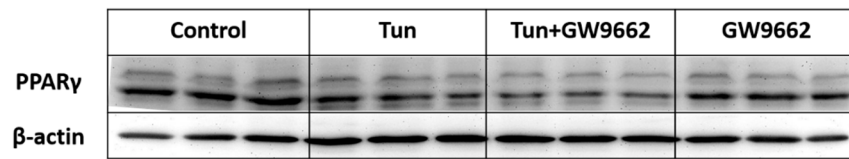

**Figure S2.** The effect of peroxisome proliferator-activated receptor gamma (Ppar $\gamma$ ) antagonist treatment in beige adipocytes. Ppar $\gamma$  protein level in IWAT cells after treatment with 1  $\mu$ M tunicamycin for 12 h with or without 10  $\mu$ M GW9662 for 13 h.

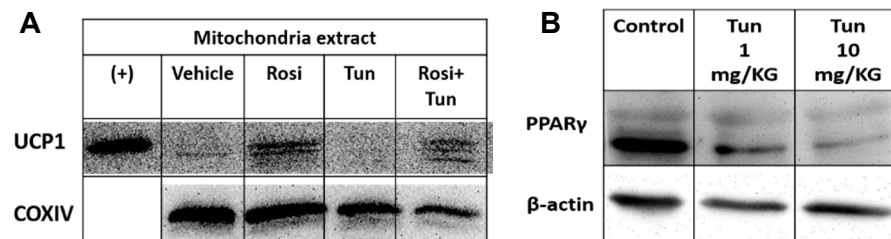

**Figure S3.** The effect of ER stress induction in IWAT. (A) UCP1 protein level in inguinal white adipose tissue (IWAT) of mice injected with vehicle, 10 mg/kg rosiglitazone for 10 days (Rosi), 10 mg/kg tunicamycin (Tun) for the last 24 h, or rosiglitazone and tunicamycin (Rosi+Tun) together. (B) Ppar $\gamma$  protein level in IWAT of mice injected with tunicamycin (dose: 1 mg/kg and 10 mg/kg) for 24 h. (+) indicates positive control (brown adipose tissue). Cytochrome c oxidase unite IV (COXIV) and  $\beta$ -actin were used as loading control.

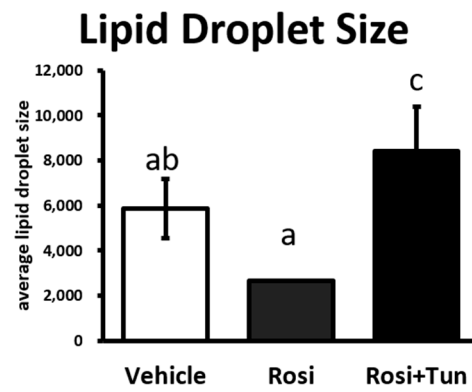

**Figure S4.** The lipid size of IWAT after ER stress stimulation. Lipid droplet size quantification of Figure 6D. Data are presented as mean  $\pm$  S.E.M. (error bars).  $n = 65$ – $130$  in each group.

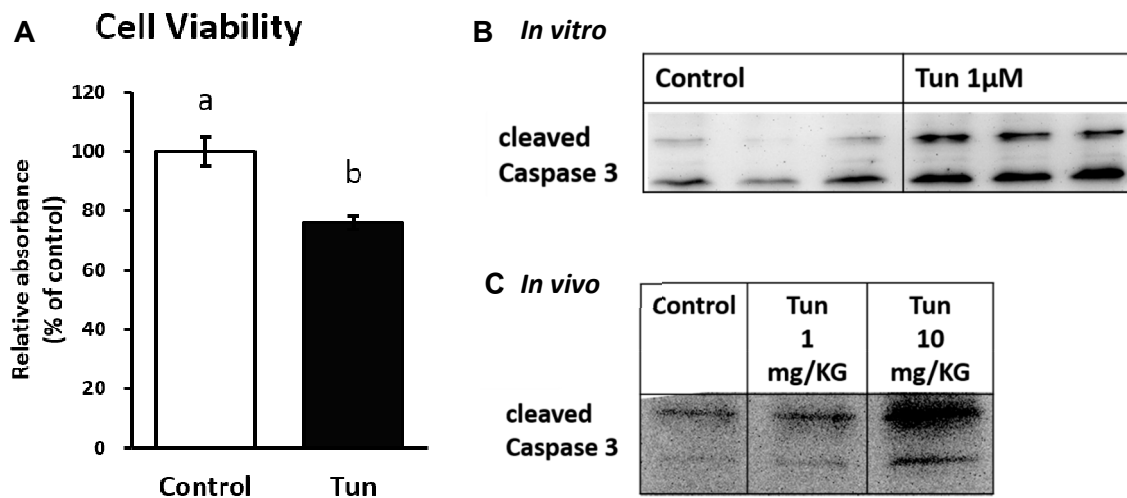

**Figure S5.** ER stress stimulation induces cell death program in beige adipocytes. (A) Cell viability of IWAT cells after treated with 1  $\mu$ M tunicamycin for 12 h, analyzed by cell titer 96® Aqueous One Solution Cell Proliferation Assay (Promega, Madison, WI, USA). Cleaved caspase-3 protein level in (B) IWAT cells after treated with 1  $\mu$ M tunicamycin (Tun 1 $\mu$ M) for 12 h or (C) IWAT of mice injected with tunicamycin (1 mg/kg or 10 mg/kg) for 24 h. Data are presented as mean  $\pm$  S.E.M. (error bars).  $n = 5$  each group.
